# Supplementary material for: Investigation of photoelectrical properties of α-Si3N4nanobelts with surface modifications using first-principles calculations
Source: Royal Society of Chemistry journal article supplement (doi:10.1039/c6cp02020h), 2016-01-01
Supplement: c6cp02020h1.pdf [file c6cp02020h1.pdf]

**Electronic supplementary information:**

The [001]-, [100]- and [110]-orientated  $\alpha$ - $\text{Si}_3\text{N}_4$  nanobelts with  $1 \times 1 \times 1$ ,  $2 \times 2 \times 1$  and  $3 \times 3 \times 1$  supercells were constructed by extracting sections of bulk  $\alpha$ - $\text{Si}_3\text{N}_4$  to examine the effects of section sizes on the energetic stability and photoelectrical properties. Table S1 lists the structural parameters of these supercells. All the surface dangling bonds of  $\alpha$ - $\text{Si}_3\text{N}_4$  nanobelts were passivated with H atoms. Fig. S1 and Fig. S2 illustrate the [001]-orientated  $\alpha$ - $\text{Si}_3\text{N}_4$  nanobelts with different section sizes and the [100]- and [110]-orientated nanobelts with  $2 \times 2 \times 1$  supercell, respectively.

**Table S1** The structural parameters of  $\alpha$ - $\text{Si}_3\text{N}_4$  nanobelts with different orientations and supercells

| Orientation | Supercell             | Lattice parameter (Å) |          |          | Cell angle (°) |         |          |
|-------------|-----------------------|-----------------------|----------|----------|----------------|---------|----------|
|             |                       | <i>a</i>              | <i>b</i> | <i>c</i> | $\alpha$       | $\beta$ | $\gamma$ |
| [001]       | $1 \times 1 \times 1$ | 7.77                  | 7.77     |          |                |         |          |
|             | $2 \times 2 \times 1$ | 15.53                 | 15.53    | 5.62     | 90             | 90      | 120      |
|             | $3 \times 3 \times 1$ | 23.30                 | 23.30    |          |                |         |          |
| [100]       | $1 \times 1 \times 1$ | 5.62                  | 7.77     |          |                |         |          |
|             | $2 \times 2 \times 1$ | 11.24                 | 15.53    | 7.77     | 60             | 90      | 90       |
|             | $3 \times 3 \times 1$ | 16.87                 | 23.30    |          |                |         |          |
| [110]       | $1 \times 1 \times 1$ | 5.62                  | 7.77     |          |                |         |          |
|             | $2 \times 2 \times 1$ | 11.24                 | 15.53    | 7.77     | 120            | 90      | 90       |
|             | $3 \times 3 \times 1$ | 16.87                 | 23.30    |          |                |         |          |

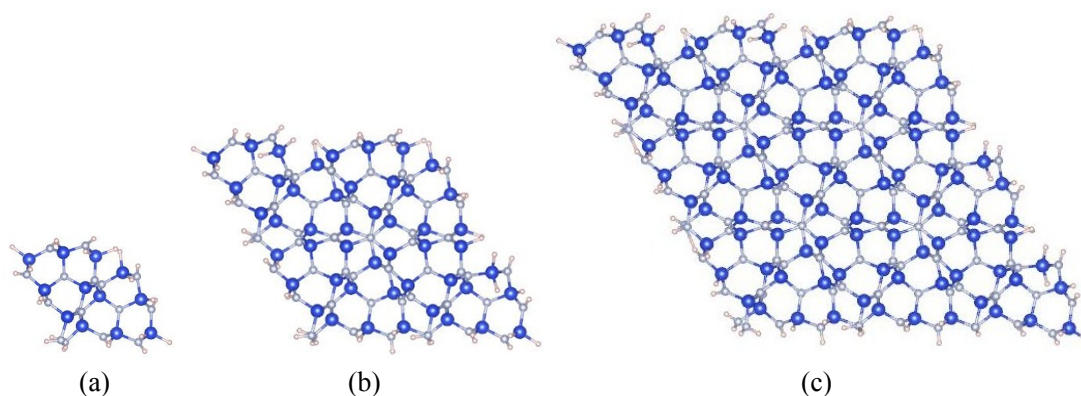

**Fig. S1** Top views of [001]-orientated  $\alpha$ - $\text{Si}_3\text{N}_4$  nanobelts with different supercells of bulk  $\alpha$ - $\text{Si}_3\text{N}_4$ : (a)  $1 \times 1 \times 1$ , (b)  $2 \times 2 \times 1$  and (c)  $3 \times 3 \times 1$ . The blue, gray and pink represent Si, N and H atoms, respectively.

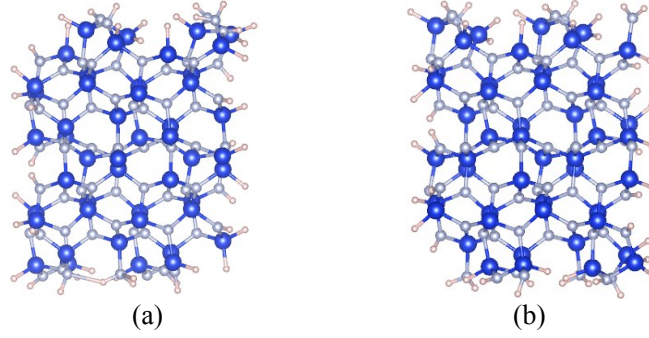

**Fig. S2** Top views of (a) [100]- and (b) [110]-orientated  $\alpha$ - $\text{Si}_3\text{N}_4$  nanobelts with  $2 \times 2 \times 1$  supercell. The blue, gray and pink represent Si, N and H atoms, respectively.

The energetic stability of these  $\alpha$ - $\text{Si}_3\text{N}_4$  nanobelts was estimated by the total energies per atom, as shown in Fig. S3. The negative values indicate that all these  $\alpha$ - $\text{Si}_3\text{N}_4$  nanobelts can be synthesized experimentally. The energy decreases with the increase of section size of  $\alpha$ - $\text{Si}_3\text{N}_4$  nanobelt, indicating the increase of energetic stability.

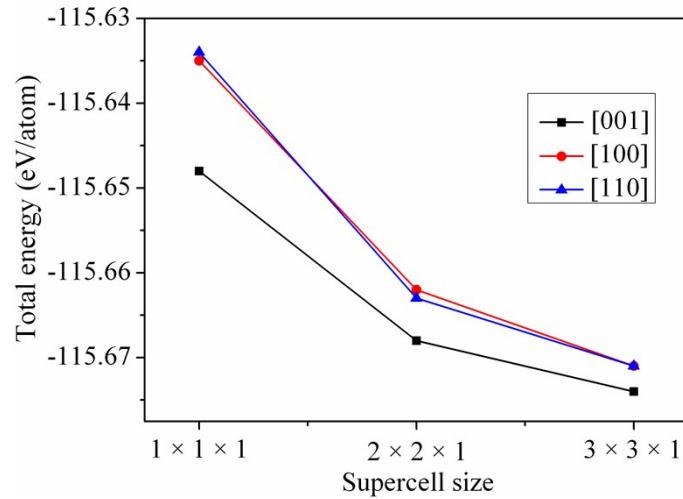

**Fig. S3** Total energy per atom as a function of supercell size for the  $\alpha$ - $\text{Si}_3\text{N}_4$  nanobelts along different directions.

The band structures of  $\alpha$ - $\text{Si}_3\text{N}_4$  nanobelts with different supercells are shown in Fig. S4. No energy levels cross the Fermi level (set as 0 eV), exhibiting semiconducting characteristics of these nanobelts. The hole and electron effective

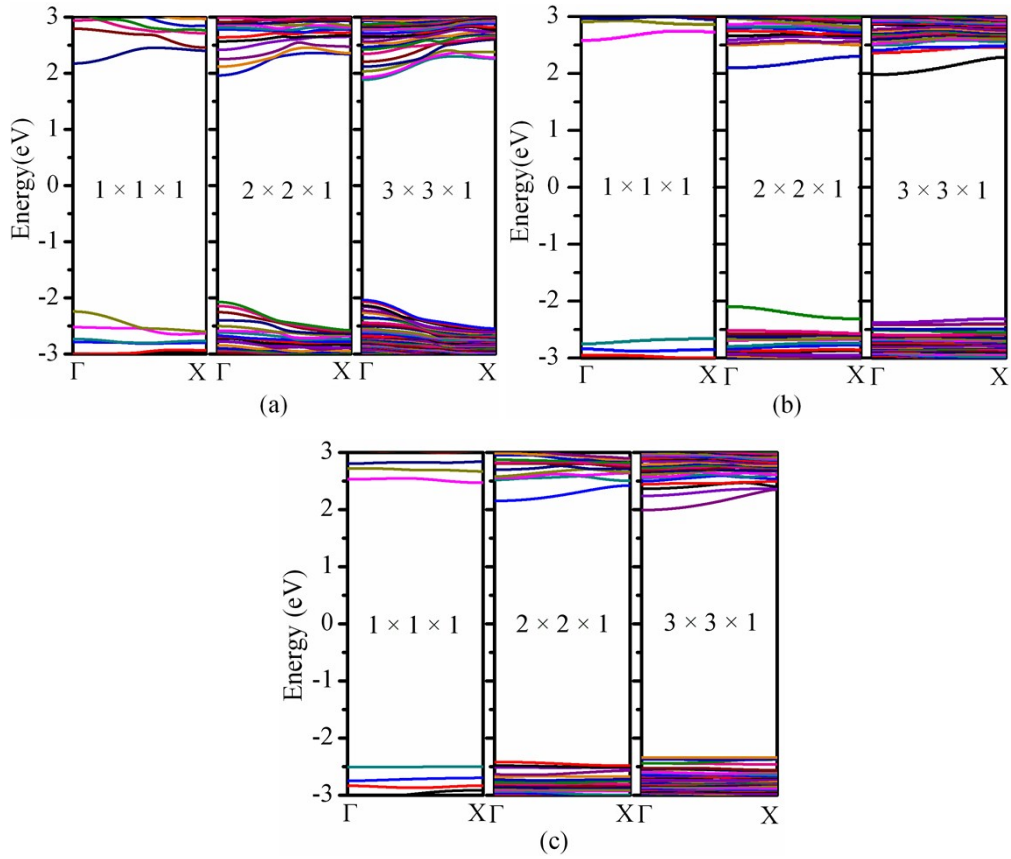

**Fig. S4** Band structures of the (a) [001]-, (b) [100]- and (c) [110]-orientated  $\alpha$ - $\text{Si}_3\text{N}_4$  nanobelts with different supercells.

masses of these  $\alpha$ - $\text{Si}_3\text{N}_4$  nanobelts are presented in Table S2, where the data before and after “/” represent the hole and electron effective masses, respectively, and the symbols “--” represent the effective masses larger than  $5m_0$ . It is shown that the section size has little effects on the effective masses of  $\alpha$ - $\text{Si}_3\text{N}_4$  nanobelts, while the orientation significantly affects them. The band gap values and characteristics based on the band structures are listed in Table S3, where “d” and “i” represent the direct and indirect band gap characteristics, respectively. The band gap values decrease with the increase of section sizes due to quantum confinement effects. Meanwhile, as the supercells increase, the gap value differences decrease. All the  $\alpha$ - $\text{Si}_3\text{N}_4$  nanobelts exhibit wide band-gap semiconductors with the band gap values larger than 3 eV.

**Table S2** The hole/electron effective masses ( $\times m_0$ )<sup>a</sup> of  $\alpha$ -Si<sub>3</sub>N<sub>4</sub> nanobelts with different supercells

| Supercell | Orientation |            |         |
|-----------|-------------|------------|---------|
|           | [001]       | [100]      | [110]   |
| 1 × 1 × 1 | -0.75/0.77  | --/1.23    | --/1.78 |
| 2 × 2 × 1 | -0.51/0.60  | --/2.17    | --/1.86 |
| 3 × 3 × 1 | -0.50/0.61  | -4.20/1.71 | --/1.64 |

<sup>a</sup>  $m_0$  is the free electron mass.

**Table S3** The band gaps (eV) and characteristics of  $\alpha$ -Si<sub>3</sub>N<sub>4</sub> nanobelts with different supercells

| Supercell | Orientation |          |          |
|-----------|-------------|----------|----------|
|           | [001]       | [100]    | [110]    |
| 1 × 1 × 1 | 4.418(d)    | 5.243(i) | 4.968(d) |
| 2 × 2 × 1 | 4.034(d)    | 4.310(d) | 4.570(d) |
| 3 × 3 × 1 | 3.923(d)    | 4.287(i) | 4.332(i) |

The partial densities of states (PDOS) of these  $\alpha$ -Si<sub>3</sub>N<sub>4</sub> nanobelts were calculated to further study their band structures. Similar results were obtained for the [001]-, [100]- and [110]-orientated  $\alpha$ -Si<sub>3</sub>N<sub>4</sub> nanobelts, so only the representative PDOSs of nanobelts orientating along the [001] direction are displayed in Fig. S5. The VBM and

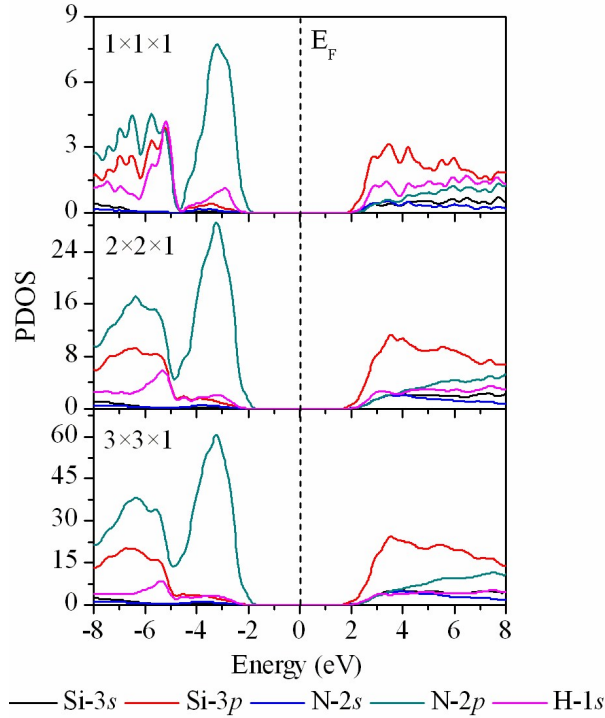**Fig. S5** PDOS of the [001]-orientated  $\alpha$ -Si<sub>3</sub>N<sub>4</sub> nanobelts with different supercells.

CBM of these  $\alpha$ -Si<sub>3</sub>N<sub>4</sub> nanobelts with different section sizes are mainly consisted by N-2*p* and Si-3*p* states, respectively, which are similar to the band gap edges of  $\alpha$ -Si<sub>3</sub>N<sub>4</sub> bulk. The H-1*s* states contribute little to the band gap edges. Moreover, the proportion of H-1*s* states at the VBM and CBM decreases with the increase of section sizes.

The optical properties of  $\alpha$ -Si<sub>3</sub>N<sub>4</sub> nanobelts with different orientations and supercells were calculated. The linear polarized light was adopted in the directions of parallel ( $E // c$ ) and perpendicular ( $E \perp c$ ) to the nanobelt axis. Fig. S6 displays the imaginary parts  $\varepsilon_2(\omega)$  of dielectric functions of nanobelts orientating along the different directions, which possess the similar results. The absorption edge is in the vicinity of 5 eV and red-shifted slightly with the increase of section sizes due to the subtle decrease of band gaps. In addition, as the section size increases, the intensity of dielectric peaks increases. While the supercells increase to  $2 \times 2 \times 1$  and  $3 \times 3 \times 1$ , the number of dielectric peaks decreases, and the peak shapes and locations tend to be similar to each other. The two well-resolved peaks locate at about 8.5 eV and 10.5 eV, and one peak with a broad distribution appears in the range of 15~17 eV. According to the PDOS in Fig. S5, these peaks mainly correspond to the transitions of N-2*p* electrons in the valence band to Si-3*p* electrons in the conduction band due to the few contributions of H-1*s* states to the band gap edges. For the  $\alpha$ -Si<sub>3</sub>N<sub>4</sub> nanobelt with  $1 \times 1 \times 1$  supercell, the newly appearing peaks may originate from the electron transitions of H-1*s* states in the valence band to Si-3*p* states in the conduction band due to the higher proportion of H-1*s* states at the band gap edges.

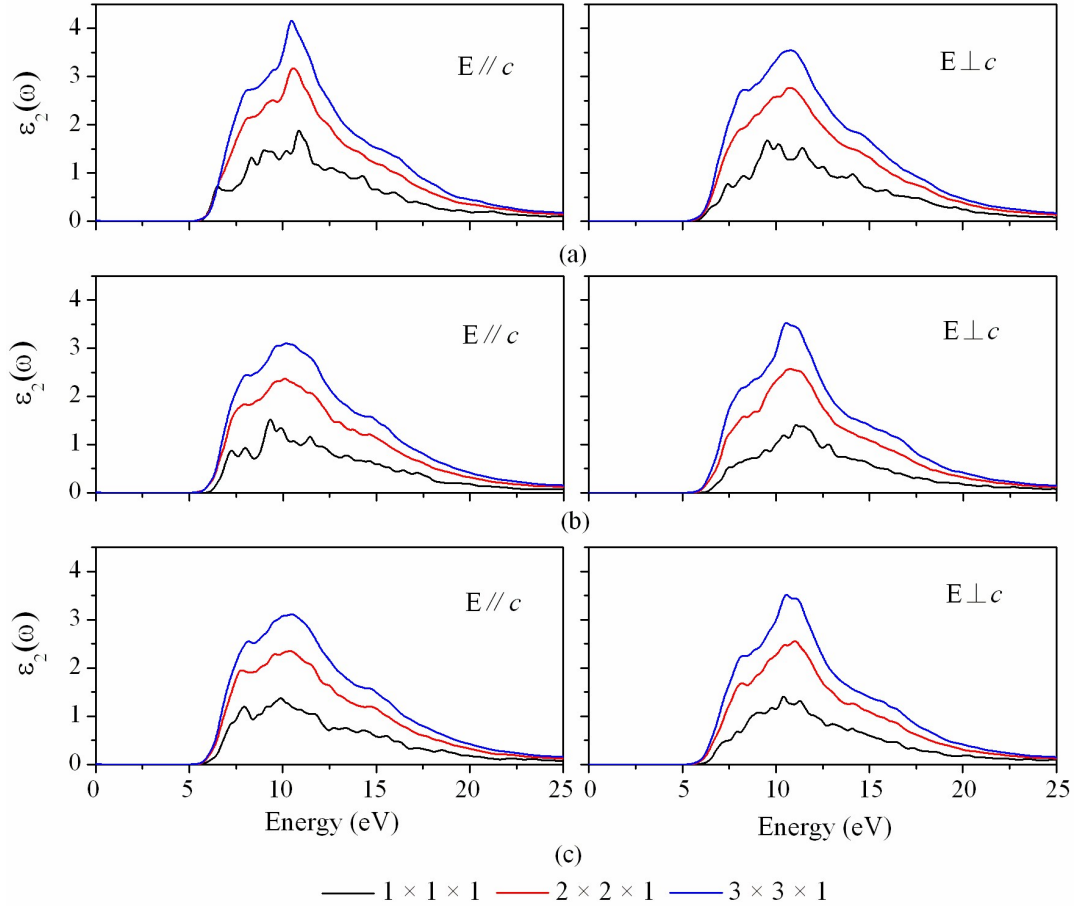

**Fig. S6** Imaginary parts  $\varepsilon_2(\omega)$  of the dielectric functions of the (a) [001]-, (b) [100]- and (c) [110]-orientated  $\alpha$ - $\text{Si}_3\text{N}_4$  nanobelts with different supercells.

The real parts  $\varepsilon_1(\omega)$  were obtained from the imaginary parts  $\varepsilon_2(\omega)$ , as shown in Fig. S7. In the energy range of 0~11 eV,  $\varepsilon_1(\omega)$  increases with the increase of section size, but at the energies higher than 11 eV, the opposite is true. Affected by the imaginary parts, the number of  $\varepsilon_1(\omega)$  peaks also decreases as the supercells increase to  $2 \times 2 \times 1$  and  $3 \times 3 \times 1$ , and the peak shapes and locations tend to be similar to each other. On the other hand, the static dielectric constant  $\varepsilon(0)$  increases with the increase of the section size due to the decrease of band gap,<sup>1</sup> as shown in Table S4. The similar phenomenon has been observed in  $\text{Si}_3\text{N}_4$  films with thickness less than 6 nm, for which the  $\varepsilon(0)$  decreases with the decrease of their thickness.<sup>2</sup> From this table, the orientations of nanobelts have an effect on the  $\varepsilon(0)$ , which decreases in the order of [001], [110] and [100].

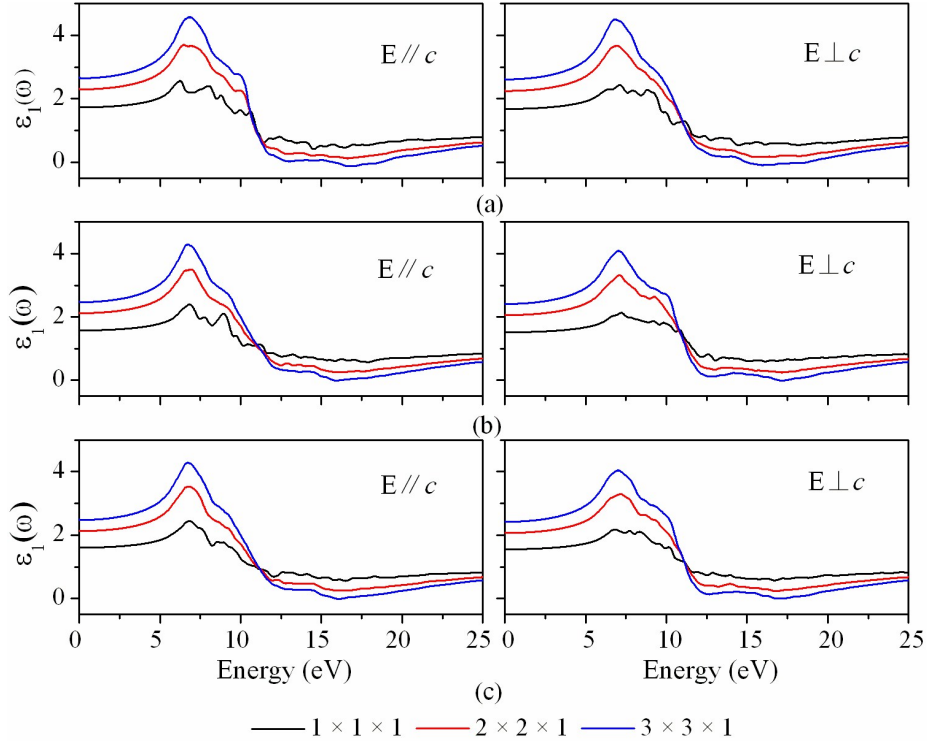

**Fig. S7** Real parts  $\varepsilon_1(\omega)$  of the dielectric functions of the (a) [001]-, (b) [100]- and (c) [110]-orientated  $\alpha$ - $\text{Si}_3\text{N}_4$  nanobelts with different supercells.

**Table S4** The static dielectric constants  $\varepsilon(0)$  of  $\alpha$ - $\text{Si}_3\text{N}_4$  nanobelts with different orientations and supercells

| Incident direction | Supercell | Orientation |       |       |
|--------------------|-----------|-------------|-------|-------|
|                    |           | [001]       | [100] | [110] |
| E//c               | 1 × 1 × 1 | 1.74        | 1.58  | 1.61  |
|                    | 2 × 2 × 1 | 2.32        | 2.13  | 2.14  |
|                    | 3 × 3 × 1 | 2.69        | 2.48  | 2.50  |
| E⊥c                | 1 × 1 × 1 | 1.68        | 1.52  | 1.55  |
|                    | 2 × 2 × 1 | 2.25        | 2.06  | 2.07  |
|                    | 3 × 3 × 1 | 2.62        | 2.41  | 2.42  |

The other static optical parameters of the  $\alpha$ - $\text{Si}_3\text{N}_4$  nanobelts, including the static reflectivity  $R(0)$  and the static refractivity  $n(0)$  can be derived from the static dielectric property, as shown in Table S5 and S6, respectively. The changes of these values as the supercells and orientations are similar to those of  $\varepsilon(0)$ .

**Table S5** The static reflectivities  $R(0)$  (%) of  $\alpha$ -Si<sub>3</sub>N<sub>4</sub> nanobelts with different orientations and supercells

| Incident direction | Supercell | Orientation |       |       |
|--------------------|-----------|-------------|-------|-------|
|                    |           | [001]       | [100] | [110] |
| E//c               | 1 × 1 × 1 | 1.88        | 1.29  | 1.40  |
|                    | 2 × 2 × 1 | 4.31        | 3.49  | 3.54  |
|                    | 3 × 3 × 1 | 5.87        | 5.00  | 5.06  |
| E⊥c                | 1 × 1 × 1 | 1.67        | 1.08  | 1.21  |
|                    | 2 × 2 × 1 | 4.00        | 3.19  | 3.24  |
|                    | 3 × 3 × 1 | 5.58        | 4.70  | 4.75  |

**Table S6** The static refractivities  $n(0)$  of  $\alpha$ -Si<sub>3</sub>N<sub>4</sub> nanobelts with different orientations and supercells

| Incident direction | Supercell | Orientation |       |       |
|--------------------|-----------|-------------|-------|-------|
|                    |           | [001]       | [100] | [110] |
| E//c               | 1 × 1 × 1 | 1.32        | 1.26  | 1.27  |
|                    | 2 × 2 × 1 | 1.52        | 1.46  | 1.46  |
|                    | 3 × 3 × 1 | 1.64        | 1.58  | 1.58  |
| E⊥c                | 1 × 1 × 1 | 1.30        | 1.23  | 1.25  |
|                    | 2 × 2 × 1 | 1.50        | 1.44  | 1.44  |
|                    | 3 × 3 × 1 | 1.62        | 1.55  | 1.56  |

Fig. S8 displays the optical conductivities of  $\alpha$ -Si<sub>3</sub>N<sub>4</sub> nanobelts with different orientations and supercells. As the section size of  $\alpha$ -Si<sub>3</sub>N<sub>4</sub> nanobelt increases, the optical conductivity increases. The [001]-orientated  $\alpha$ -Si<sub>3</sub>N<sub>4</sub> nanobelt with 3 × 3 × 1 supercell possesses the largest conductivity value of  $6.0 \times 10^3 \Omega^{-1} \cdot \text{cm}^{-1}$  at about 11 eV for light polarized parallel to the nanobelt axis. While the supercells increase to 2 × 2 × 1 and 3 × 3 × 1, the number of peaks decreases, and the peak shapes and locations tend to be similar to each other. The main peaks locate at about 8, 11 and 15 eV, which are accord with the imaginary parts  $\varepsilon_2(\omega)$  of dielectric functions. Additionally, the minimum photo energies are above 5 eV and red-shifted slightly with the increase of section sizes due to the subtle decrease of band gaps.



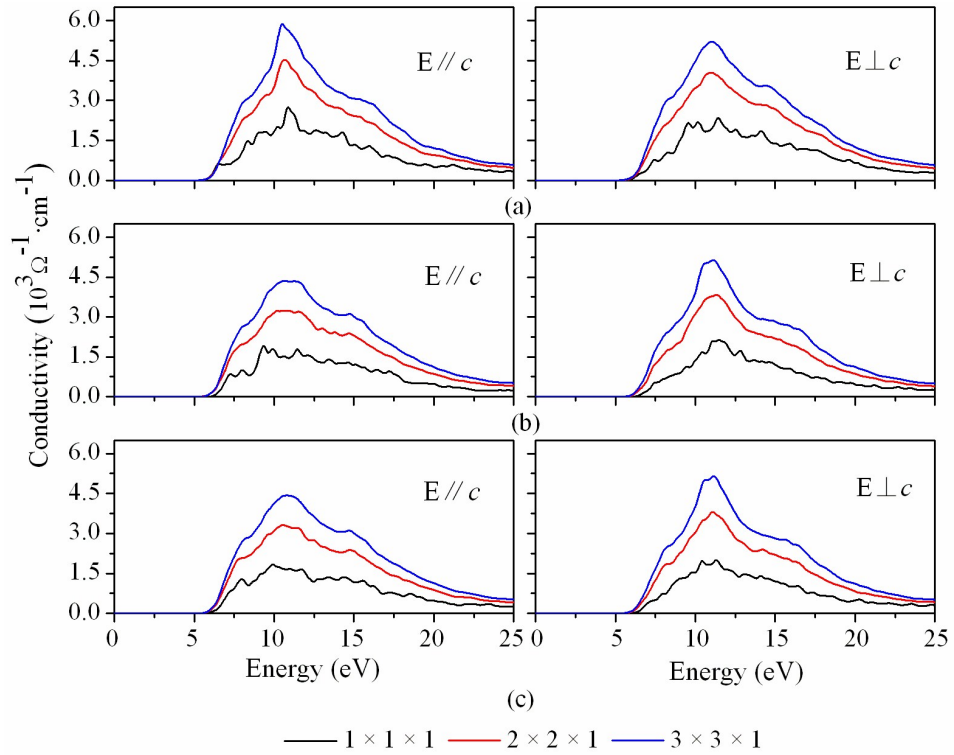

**Fig. S8** Optical conductivities of the (a) [001]-, (b) [100]- and (c) [110]-orientated  $\alpha$ -Si<sub>3</sub>N<sub>4</sub> nanobelts with different supercells.

## References

- [1] Z. F. Huang, F. Chen, R. Su, Z. H. Wang, J. Y. Li, Q. Shen, L. M. Zhang, *J. Alloy. Compd.*, 2015, **637**, 376-381.
- [2] T. A. Pham, T. Li, S. Shankar, F. Gygi, G. Galli, *Appl. Phys. Lett.*, 2010, **96**, 062902.
